# Supplementary material
Source: PubMed Central journal article supplement (PMC7817159)
Supplement: pnas.2015632118.sapp.pdf [file pnas.2015632118.sapp.pdf]

Supplementary Information for

**Recruitment of pro-IL-1a to Mitochondrial Cardiolipin, via shared LC3 Binding Domain, Inhibits mitophagy, and Drives maximal NLRP3 Activation**

Jargalsaikhan Dagvadorj, Karolina Mikulska-Ruminska, Gantsetseg Tumurkhuu, Rojo A. Ratsimandresy, Jessica Carriere, Allen M. Andres, Stefanie Marek Iannucci, Yang Song, Shuang Chen, Malcolm Lane, Andrea Dorfleutner, Roberta A. Gottlieb, Christian Stehlik<sup>4</sup>, Suzanne Cassel, Fayyaz S. Sutterwala, Ivet Bahar, Timothy R. Crother and Moshe Arditi

Corresponding Authors: I.B., T.R.C., or M.A. (e-mail: bahar@pitt.edu, timothy.crother@cshs.org, or moshe.arditi@cshs.org)

**This PDF file includes:**

SI Methods  
Figures S1 to S8  
Tables S1 to S3  
Legends for Movies S1 and S2  
SI References

**Other supplementary materials for this manuscript include the following:**

Movies S1 to S2

## SI Methods

**Immunoprecipitation and protein-lipid overlay assay.** HEK293 cells were transfected with pHIV-dTomato-mIL-1a-Flag or pHIV-dTomato-mIL-1a-RR-Flag using Lipofectamine 2000 transfection reagent (Invitrogen). Twenty-four hours after transfection, the cells were washed with 1X DPBS and lysed by sonication in NP-40 cell lysis buffer [50mM Tris pH 8.0, 150mM NaCl, 1% NP-40, 1mM PMSF, 1mM Na<sub>3</sub>VO<sub>4</sub> and protease inhibitors cocktail (Roche)]. Total cell lysates were pre-cleared by centrifugation (14,000 rpm at 4°C for 5 min) and subjected to immunoprecipitation with 30 µL of 50% slurry anti-Flag M2 agarose affinity gel (Millipore) or isotype control (IgG, Santa Cruz Biotechnology) with Protein A/G agarose (Santa Cruz Biotechnology) for 16h at 4°C. The beads were washed extensively in NP-40 cell lysis buffer to remove unbound proteins. The beads were then blocked in 3% fatty acid-free BSA in TBS (25mM Tris, 150mM NaCl pH 7.2) for 15 min at 4°C followed by incubation with 10 µM sn-1-Fluorescein-labeled cardiolipin (Echelon Biosciences) for 30 min at room temperature in cardiolipin binding buffer (3% fatty acid-free BSA, 1mM CaCl<sub>2</sub> in TBS). The beads were washed extensively in TTBS (0.05% Tween-20 in TBS) to remove the unbound cardiolipin. The beads were placed into a black optical bottom 96-well plate and the FITC fluorescence intensity was measured at 29 points of each well using a Varioskan™ LUX multimode microplate reader (Thermofisher Scientific). Images were captured using an Echo Revolve fluorescent microscope (Echo). Finally, immunoprecipitated flag proteins were eluted by denaturing electrophoresis sample buffer and subjected to PAGE followed by immunoblotting and ECL detection.

**LC3 Western Blot.** After cell treatments, media was aspirated and cells were rinsed with PBS. Cells were then lifted from plates in PBS, transferred to a microfuge tube and spun down at 300xg for 5 mins. PBS was removed and 500 $\mu$ L mitochondrial isolation buffer (250mM Sucrose, 1mM EDTA, 10mM HEPES, pH 7.4) containing protease and phosphatase inhibitors (Roche) was added. Cells were then lysed mechanically by passing them through 27.5 gauge needle with a 1mL syringe 3 times. Nuclei and unbroken cells were eliminated by centrifuging homogenates at 1000xg, 4°C, for 5 mins. The resulting supernatant was then centrifuged further (7000xg, 4°C, 10 mins) to obtain the mitochondria-enriched heavy membrane fraction and separate the cytosol. The pellet was rinsed with a small volume of homogenization buffer (200 $\mu$ L) and re-spun down to eliminate the rinse buffer (7000xg, 4°C, 5 minutes). The mitochondria-enriched heavy membrane fraction was then resuspended in isolation RIPA buffer containing appropriate inhibitors. Samples were stored at -20°C until use.

Mitochondrial-enriched and cytosolic fractions and of samples were resolved using Bolt 4-12% Bis-Tris Plus gels and transferred onto nitrocellulose membranes. Blots were probed for LC3 (Cell Signaling). Immunoreactive bands were developed using Bio-Rad Clarity reagent and visualized with a ChemiDoc XRS system (Bio-Rad) followed by densitometry using NIH ImageJ software.

**Cytokine assay.** Cell culture supernatants were assayed using commercially available ELISA kits for murine IL-1 $\beta$ , IL-1 $\alpha$  and TNF- $\alpha$  (eBioscience; San Diego, CA) according to the manufacturer's instructions. IL-18 level was determined by IL-18 ELISA kit (R and D).

**Homology Modeling of Pro-IL1 $\alpha$  structure.** Pro-IL $\alpha$  consists of 271 residues, including an N-terminal segment of 112 residues which is cleaved upon maturation. Due to the absence of a structure for the intact pro-IL1 $\alpha$ , we generated a structural model using available structural data for sequence homologs. First, we constructed a homology model for the S70-I109 region using Swiss-Model (1). To this end, we identified as templates the lipoprotein LptE (PDB (2) id: 5IVA, 20% sequence identity with respect to the fragment S70-I109) and a calcium-binding protein (2LGE, 40% sequence identity with respect to the same fragment) which shared similar secondary structure and contained the fragment of interest G78-L88 marked as signaling peptide (Fig. S3A). Second, the homology model and a crystal structure of mature IL1 $\alpha$  (N121-A271, PDB id: 2KKI) were merged with the intervening sequence of 11 residues (K110-S120) using the AIDA package (3). The structurally unknown residues between the two fragments were computationally modeled to generate a unified structural model of 202 residues (Fig. S3B).

**Equilibration of structural model and selection of stable conformer.** Equilibration simulations were performed for human pro-IL1 $\alpha$  (S70-A271) structural model using the NAMD (4) software package with the CHARMM27 force field (5) and explicit water models (TIP3P) (6). We adapted the following protocol: equilibration of water for 0.2 ns, 10,000 steps of energy minimization each step of size 2 fs, 0.35 ns of heating from 0 to 300 K, and 0.15 ns equilibration of the whole system before conducting a 200 ns all-atom molecular dynamics (MD) simulations to verify the equilibrium conformations of IL1 $\alpha$ . We used 2 fs time step and a cutoff of 12 Å for non-bonded interactions. Langevin dynamics

and the Langevin piston algorithm were used to maintain isothermal and isobaric conditions at  $T = 300$  K and  $P = 1$  atm.

A total of 6 ensembles of structural models were identified upon clustering (principal component analysis, PCA) of the generated trajectory using the ProDy (7, 8) application programming interface (API) (Fig. S4). We used the mean shift algorithm (9) to distinguish the number of clusters, their distribution, and centers (see Fig. S4A). The structural model which exhibited the lowest average root-mean-square-deviation (RMSD) from all other members in a given cluster was further selected as a representative conformer for each cluster (Fig. S4A, *left, ribbon diagrams* color-coded after the clusters). The selected models were placed near a lipid bilayer which contained two types of lipid molecules: cardiolipin (CL) and 1,2-dioleoyl-sn-glycero-3-phosphocholine (DOPC) to examine the interactions between the protein and lipid molecules in MD simulations.

**Molecular Dynamics (MD) simulations.** We used CHARMM-GUI package (10) (11-13) for examining the stability and dynamics of the above selected 6 representative models. The simulation system contained over 70,000 atoms, including the lipid bilayer composed of DOPC and CL molecules (designated as PMCL2), water molecules, and  $\text{Ca}^{++}$  and  $\text{Cl}^-$  ions (Fig. S4B). The membrane was 80 Å long and wide, and contained 14 PMCL2 and 70 DOPC lipids. The protein was placed in the aqueous environment, with the closest distance of atom-atom approach from the membrane being 10 Å. We performed a series of simulations in the presence or absence of two posttranslational modifications: a phosphoserine at position 87 (pS87) and myristoylation of the lysines at position 82 and 83 (mK82, MK83), as indicated by UniProtKB (14) (accession number: P01583). These

modifications required the adoption of ten times longer system setup and minimization procedures compared to default parameters. One of the 6 structural models was observed to be stable and was selected for further studies: (a) 12 productive MD runs with pS87 and mK82-mK83 PTMs, and (b) 10 productive MD runs without phosphorylation of S87, but with mK82 and mK83. Each trajectory was 100 ns long. VMD (15) and ProDy (16) were used for visualizing and analyzing the trajectories.

**Sequence alignment.** Pairwise sequence alignment between Pro-IL-1 $\alpha$  and LC3 was performed using ClustalX (17) and visualized with Jalview (18) using the LC3 sequence available in the PDB (PDB: 1UGM) and the S70-A271 fragment of Pro-IL1 $\alpha$  used in MD studies.

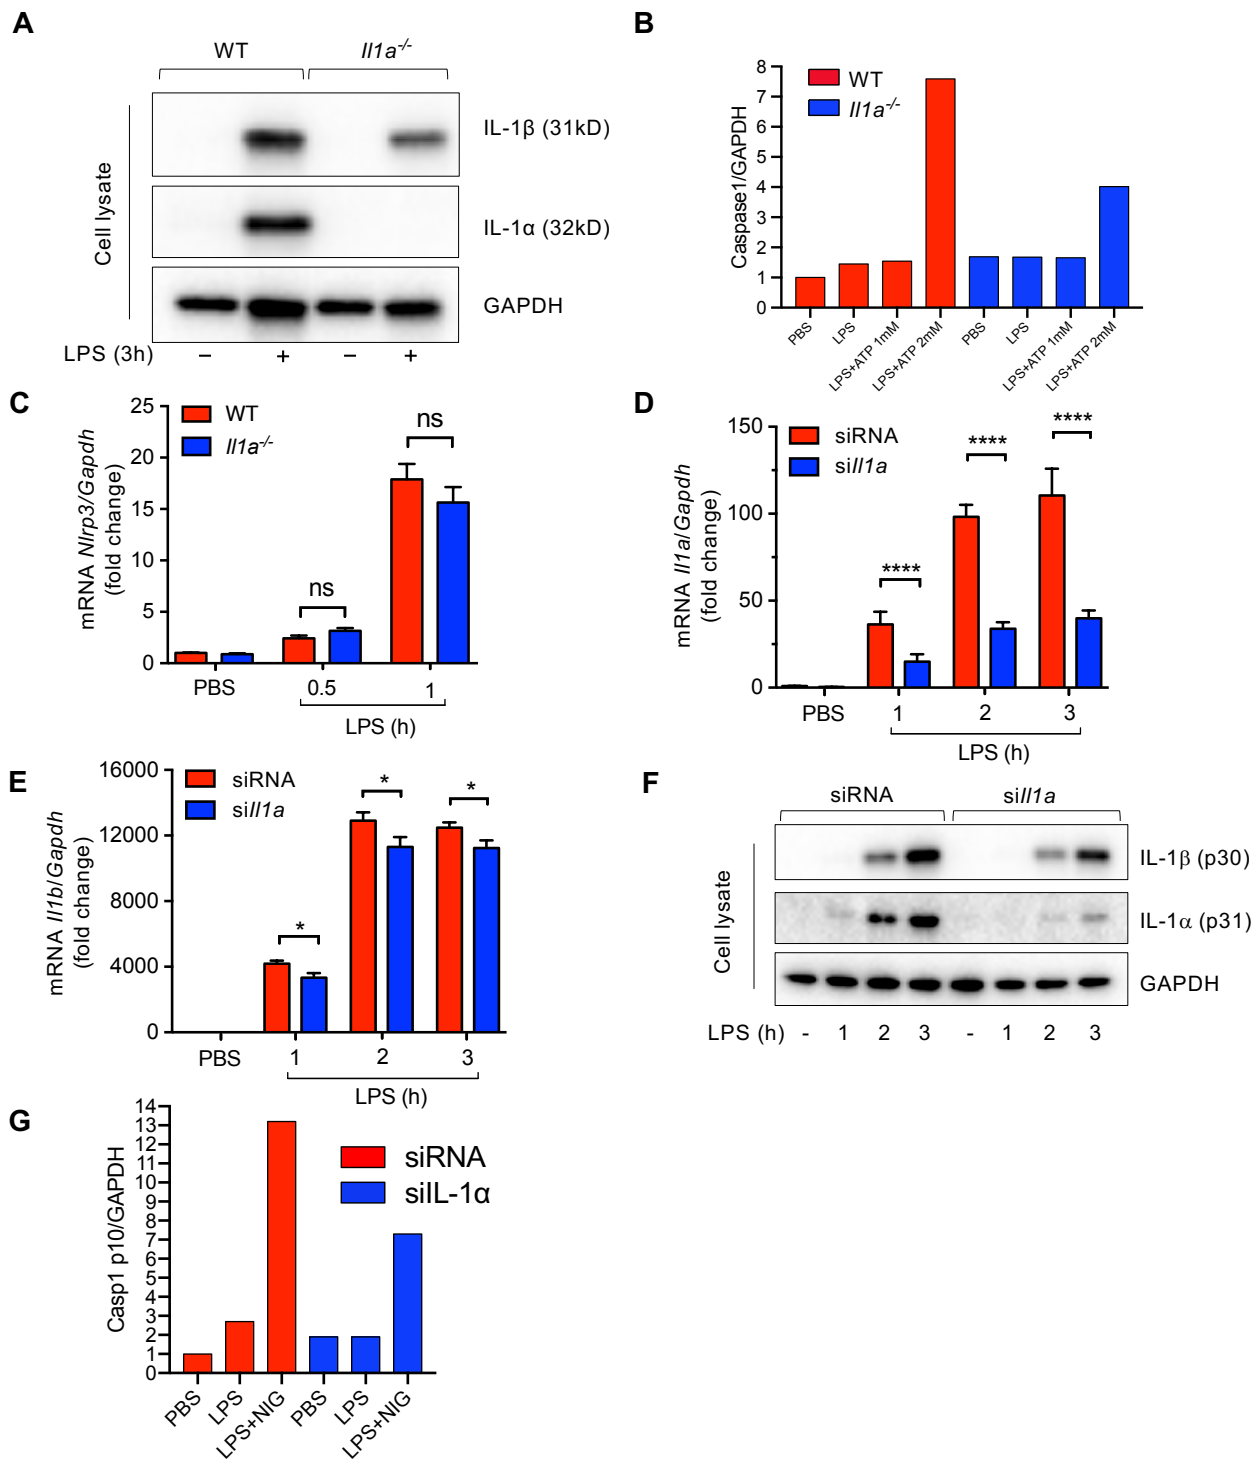

**Figure S1.** (A) Wt and *I11a*<sup>-/-</sup> peritoneal macrophages were treated with LPS for 3 hr. IL-1α and IL-1β were assessed by immunoblot. (B) Densitometry analysis of cleaved Caspase-1 from Figure 1A. (C) *Nlrp3* mRNA expression was measured by quantitative RT-PCR in peritoneal macrophages following LPS stimulation. mRNA expression was normalized to the reference gene GAPDH. (D) *I11a* mRNA expression was measured by quantitative RT-PCR in peritoneal macrophages transfected with siRNA or *siI11a* for 48h and then stimulated with PBS or LPS for 3h. mRNA expression was normalized to the reference gene GAPDH. (E) *I11b* mRNA expression was measured by quantitative RT-PCR in peritoneal macrophages transfected with siRNA or *siI11a* for 48h and then stimulated with PBS or LPS for 3h. mRNA expression was normalized to the reference gene GAPDH. (F) WT peritoneal macrophages were transfected with siRNA or *siI11a* for 48h and stimulated with PBS or LPS for 3h. Immunoblotting analysis for IL-1β and IL-1α in cell lysate. (G) Densitometry analysis of cleaved Caspase-1 from Figure 1H. Results are representative of 3 independent experiments. All data represent mean ± SD; (Student's t-test), \**p*<0.05, \*\*\**p*<0.001.

Membrane potential TMRM 200nM

WT

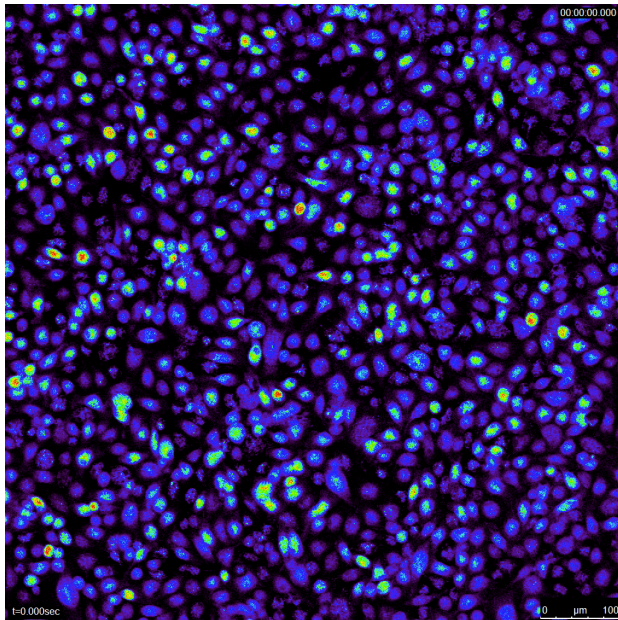

*Il1a*<sup>-/-</sup>

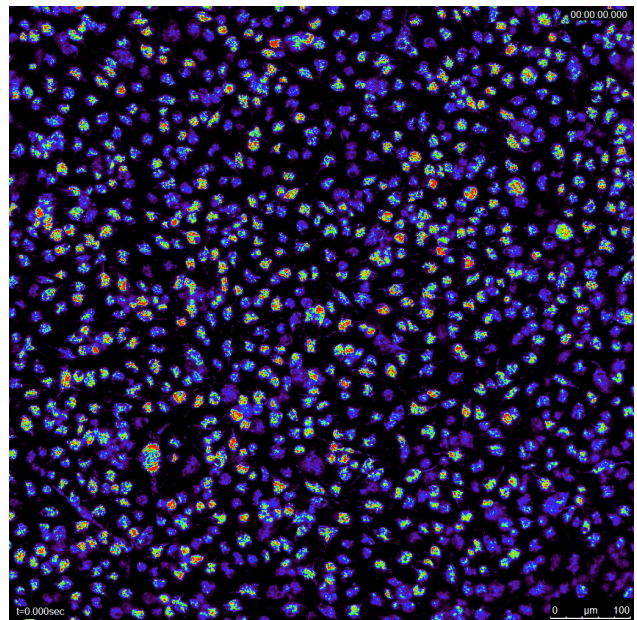

LPS (3h) +ATP (2mM)

**Movie S1 and S2.** WT (S1) and *Il1a*<sup>-/-</sup> (S2) peritoneal macrophages were treated with LPS and ATP and stained with TMRM to observe mitochondrial membrane potential changes.



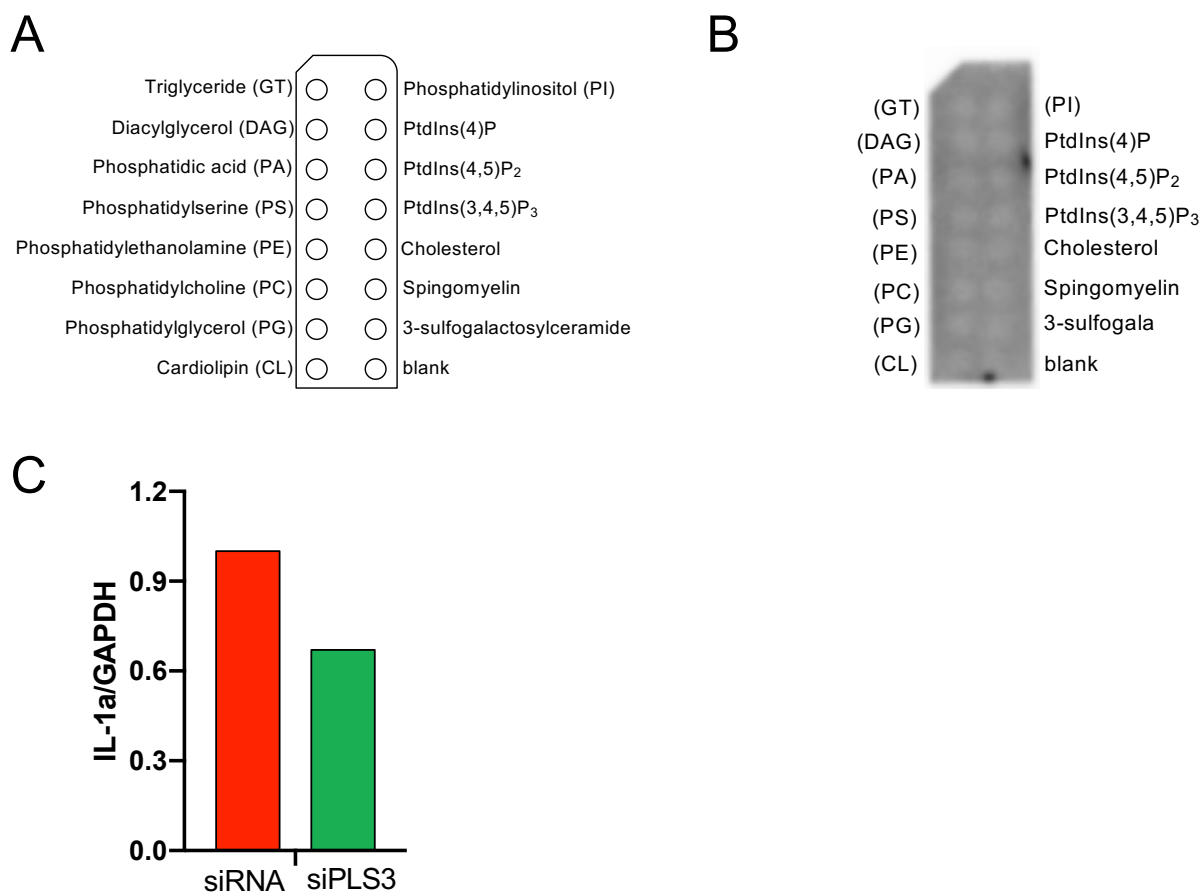

**Figure S2.** (A) Layout of lipid strip samples. (B) Lipid Strip probes with cell lysates from unstimulated WT peritoneal macrophages. (C) Densitometric analysis of IL-1 $\alpha$  present in mitochondrial fraction from Figure 2F.

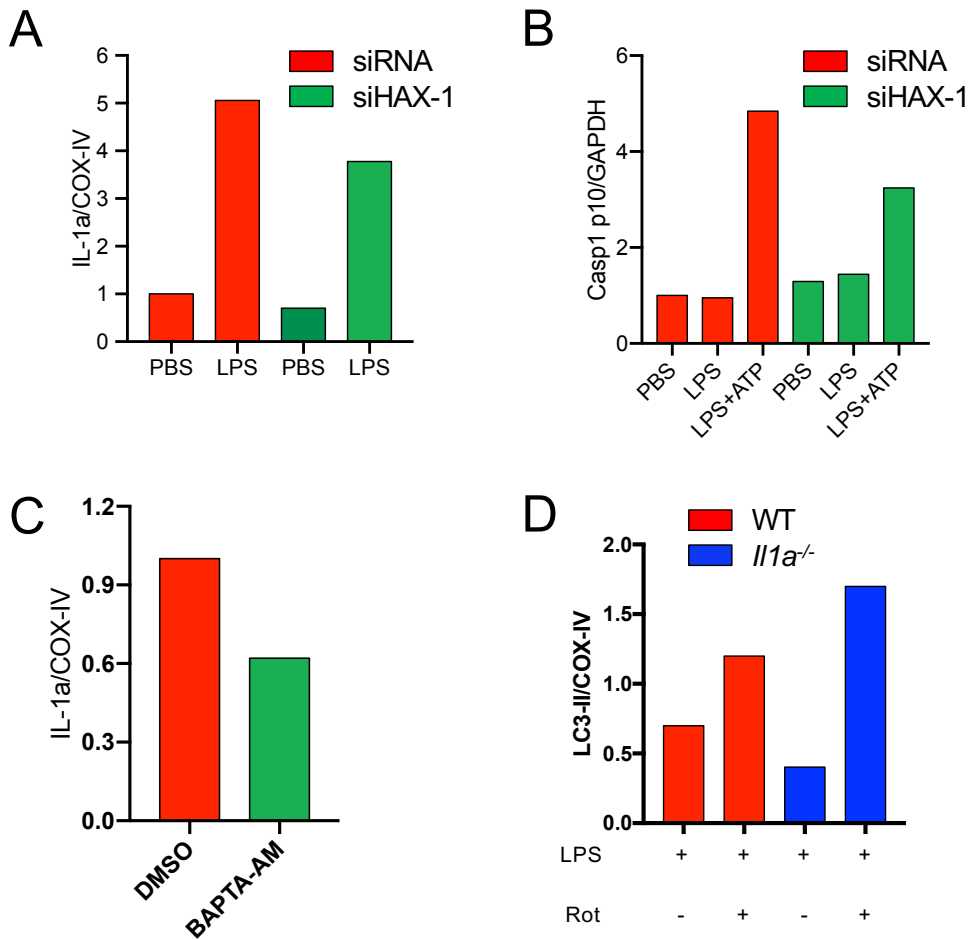

**Figure S3.** (A) Densitometric analysis of IL-1 $\alpha$  present in mitochondrial fraction from Figure 3A. (B) Densitometric analysis of cleaved Caspase-1 present in cytosolic fraction from Figure 3B. (C) Densitometric analysis of IL-1 $\alpha$  present in mitochondrial fraction from Figure 3E. (D) Densitometric analysis of LC3-II present in mitochondrial fraction from Figure 4B normalized to COX-IV.

A

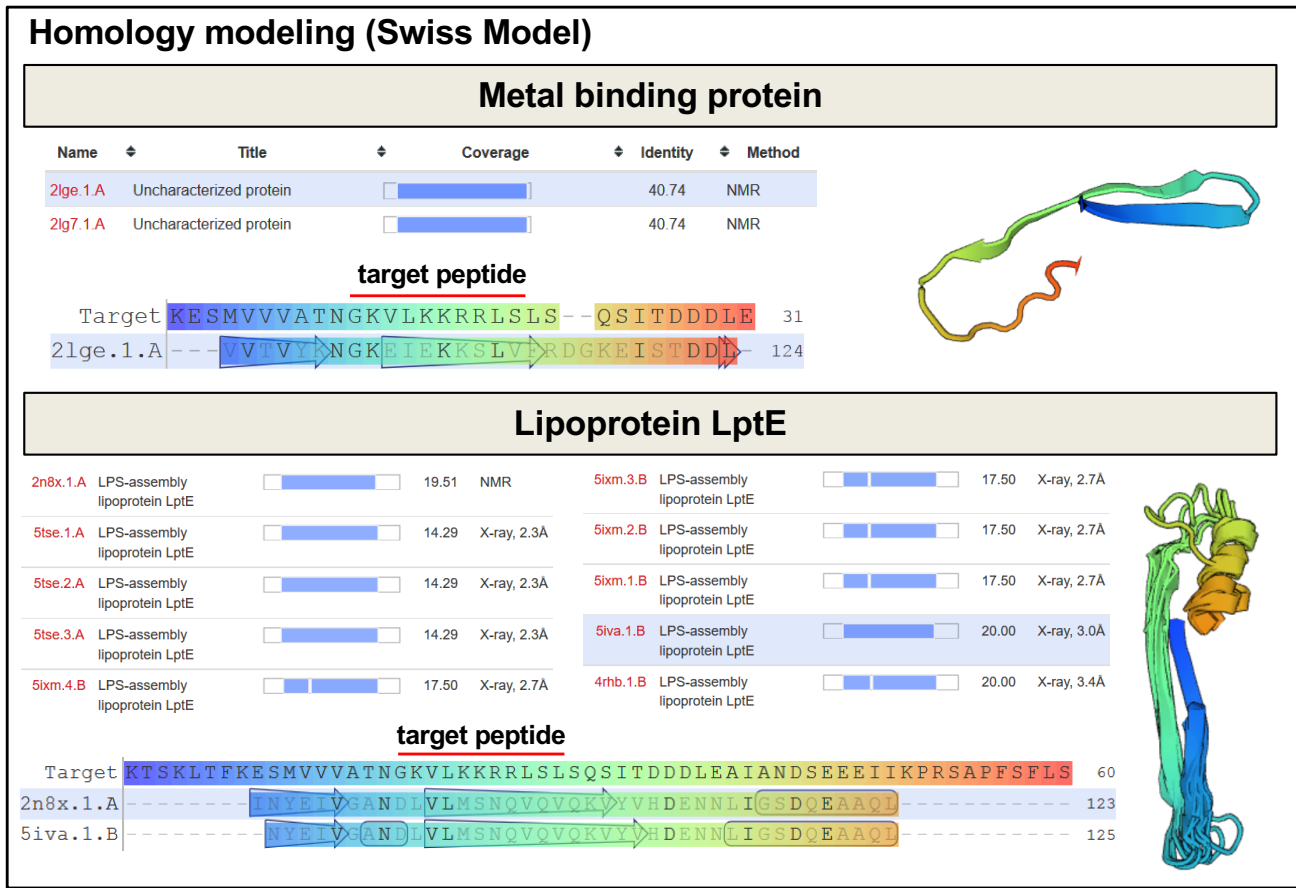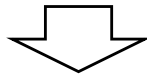

B

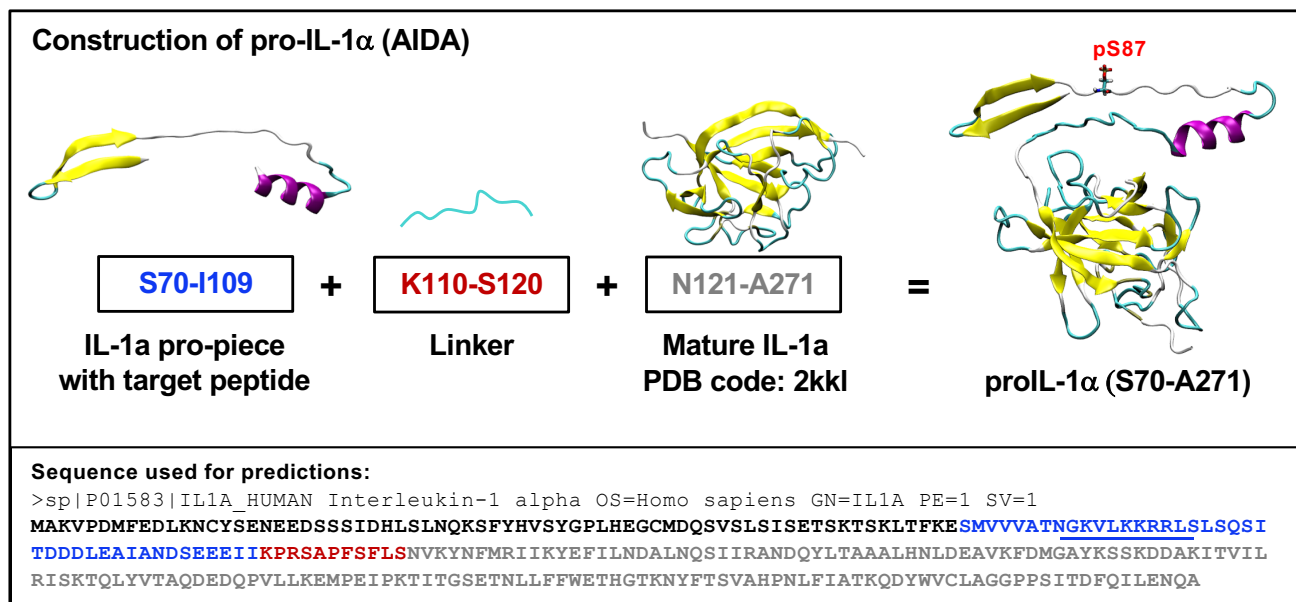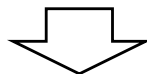

Molecular Dynamics (MD) simulation

**Figure S4. Construction of pro-IL1 $\alpha$  model (S70-A271).** (A) Homology modeling of S70-I109 fragment based on a metal-binding protein (PDB: 2lge, 40% sequence identity with respect to pro-IL-1 $\alpha$ ) and lipoprotein LptE (5iva, 20% sequence identity). We identified two templates using Swiss-Model server. The alignments of the selected templates and target sequence are shown together with the corresponding secondary structures and 3D models. The analysis also yielded a few other lipoproteins with lower sequence identity and coverage. (B) Construction of S70-A271 portion of pro-IL1 $\alpha$  by stitching together three fragments: (1) Homology model for S70-I109 which contains the signal peptide G78-L88, obtained from Swiss-Model, (2) the K110-S120 fragment not resolved structurally, and (3) the mature IL1 $\alpha$  structure available in the PDB as 2KKI: N121-A271. As a last step 200 ns MD simulation with explicit solvent was performed for generating a stable conformer.

A

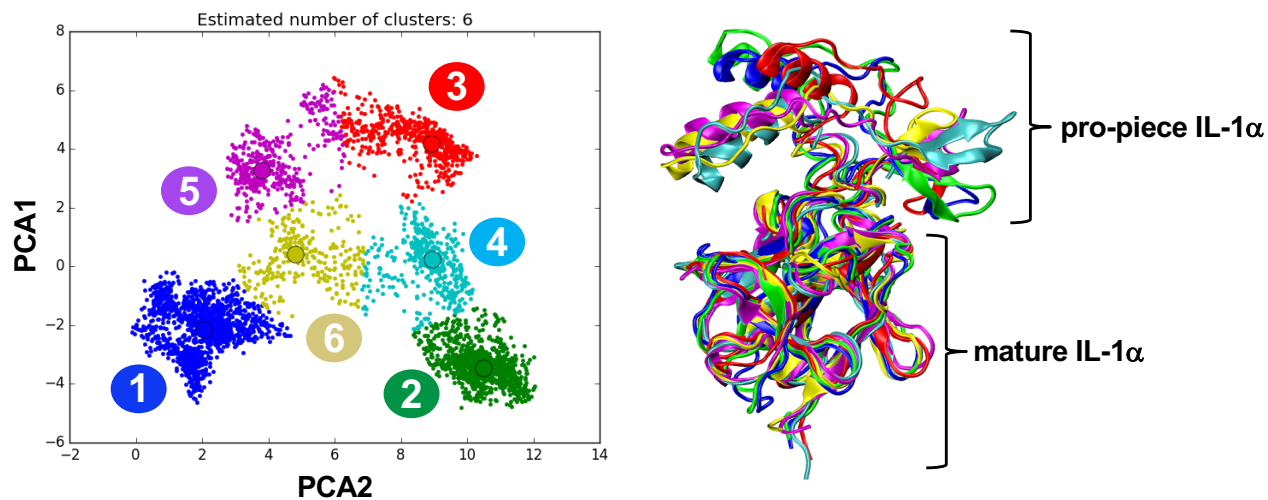

B

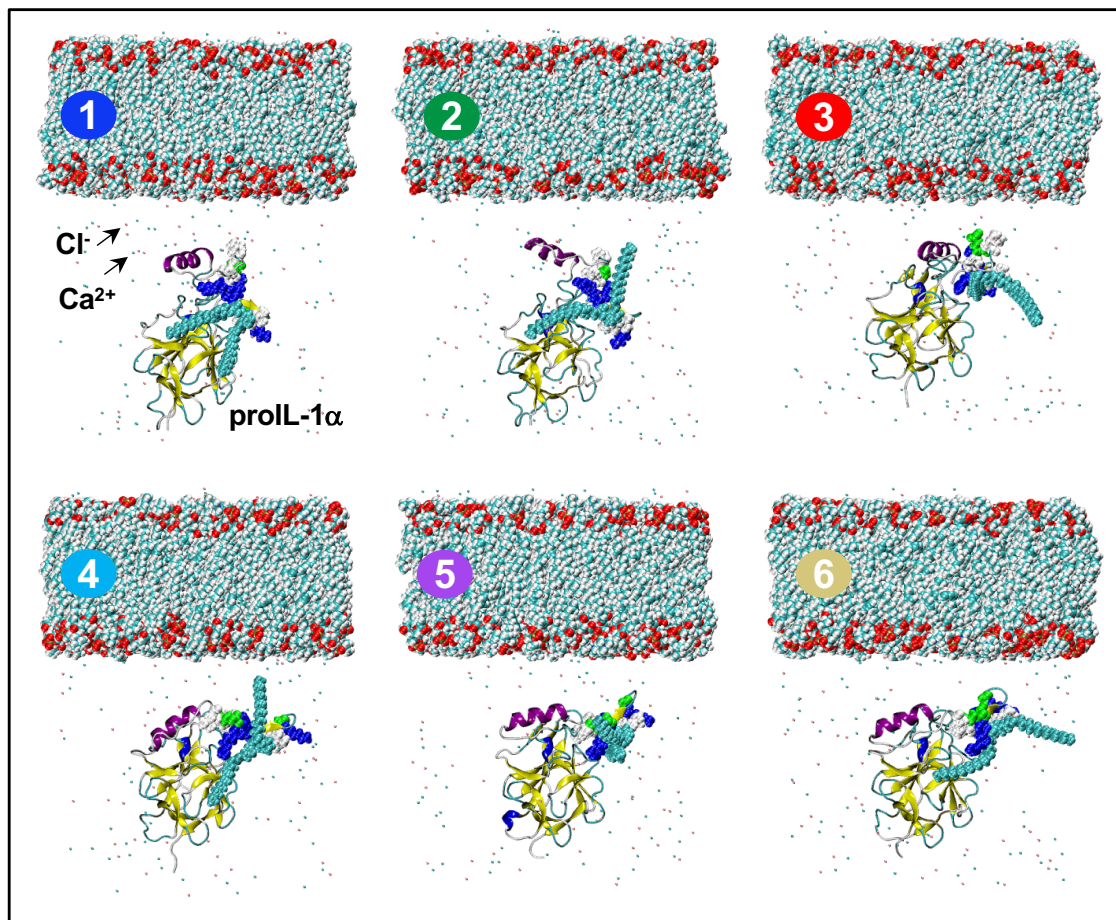

**Figure S5. Structural models identified by PCA of 200 ns MD trajectories generated for pro-IL1α fragment S70-A271.** (A) Distribution of pro-IL1α conformations into six clusters: 1-blue, 2-green, 3-red, 4-cyan, 5-magenta, 6-yellow. *Right panel* shows the structural alignment of the 6 conformers representative of each cluster. Structural models are colored by the corresponding cluster. (B) Six equilibrium conformers of pro-IL1α placed near a lipid bilayer that contains CL and DOPC molecules. The signal peptide in each case is displayed in *balls representation* (color guide: cyan – mK82-83, blue – charged residues from G78-L88). Small points represent Ca<sup>2+</sup> and Cl<sup>-</sup> ions.

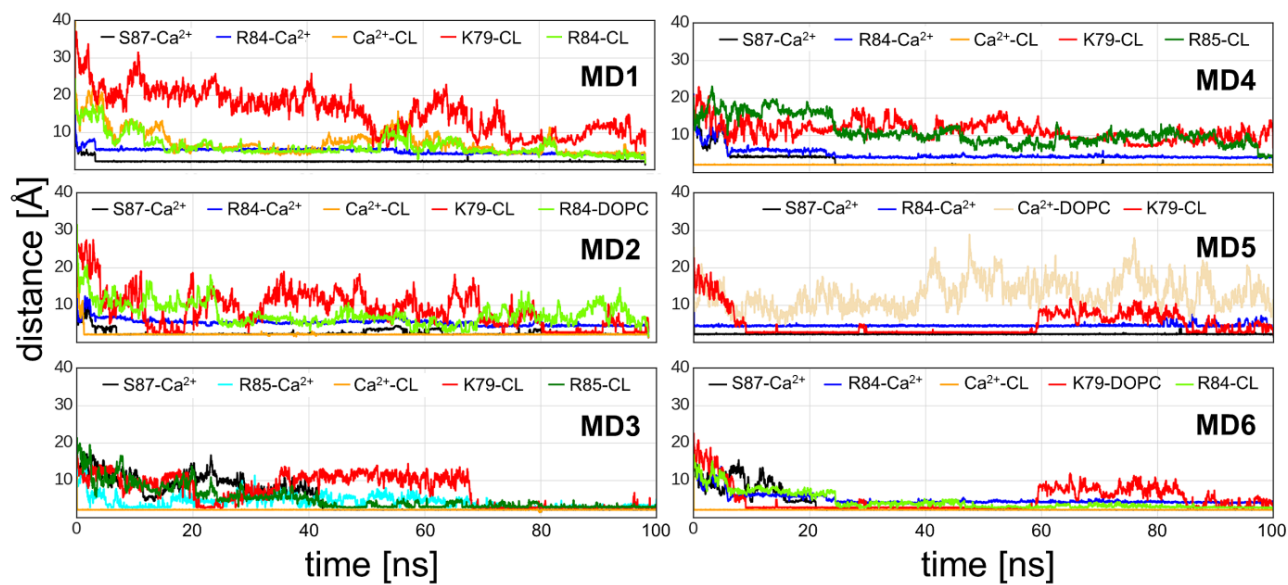

**Figure S6.** Evolution in the distance for 6 MD runs of Type I interactions of pro-IL1 $\alpha$ , Ca<sup>2+</sup> ion and the membrane lipids (CL and DOPC).

A

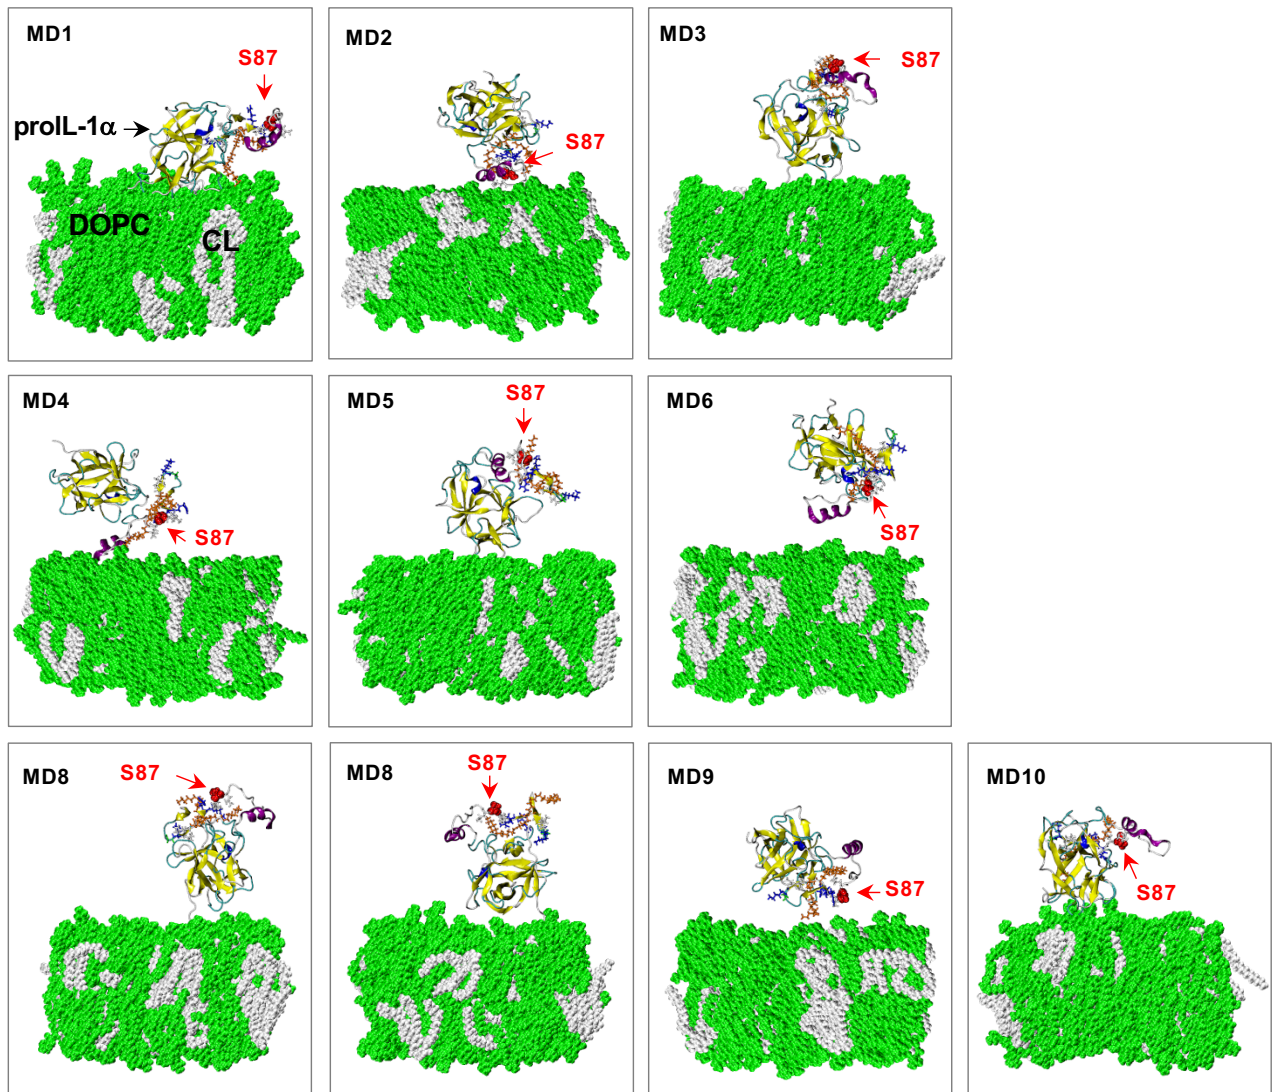

B

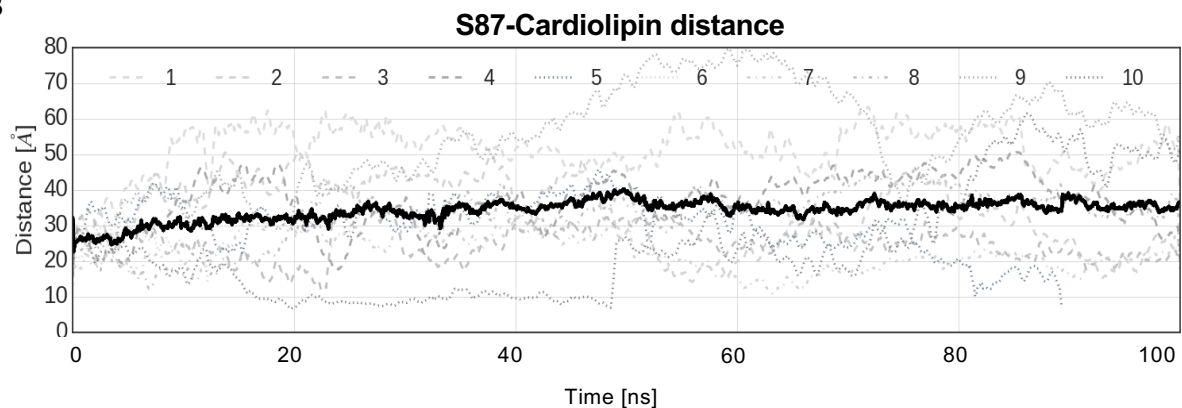

**Figure S7. Lack of interaction between Pro-IL1 $\alpha$  S87 and CL molecules in the absence of S87 phosphorylation.** (A) Snapshots from 10 independent runs illustrate the lack of a stable interaction between pro-IL1 $\alpha$  with DOPC-CL-bilayer. Color guide: DOPC: green, CL: white, S87 from pro-IL1 $\alpha$ : red spheres, mK82-K83 from pro-IL1 $\alpha$ : orange. Red arrows point the position of signal peptide residues (G78-L88). (B) Time evolution of the distance between S87 and the closest CL for each of 10 MD runs (grey dotted lines). Average curve of all 10 runs maintains the distance of 25-40 Å, shown in black.

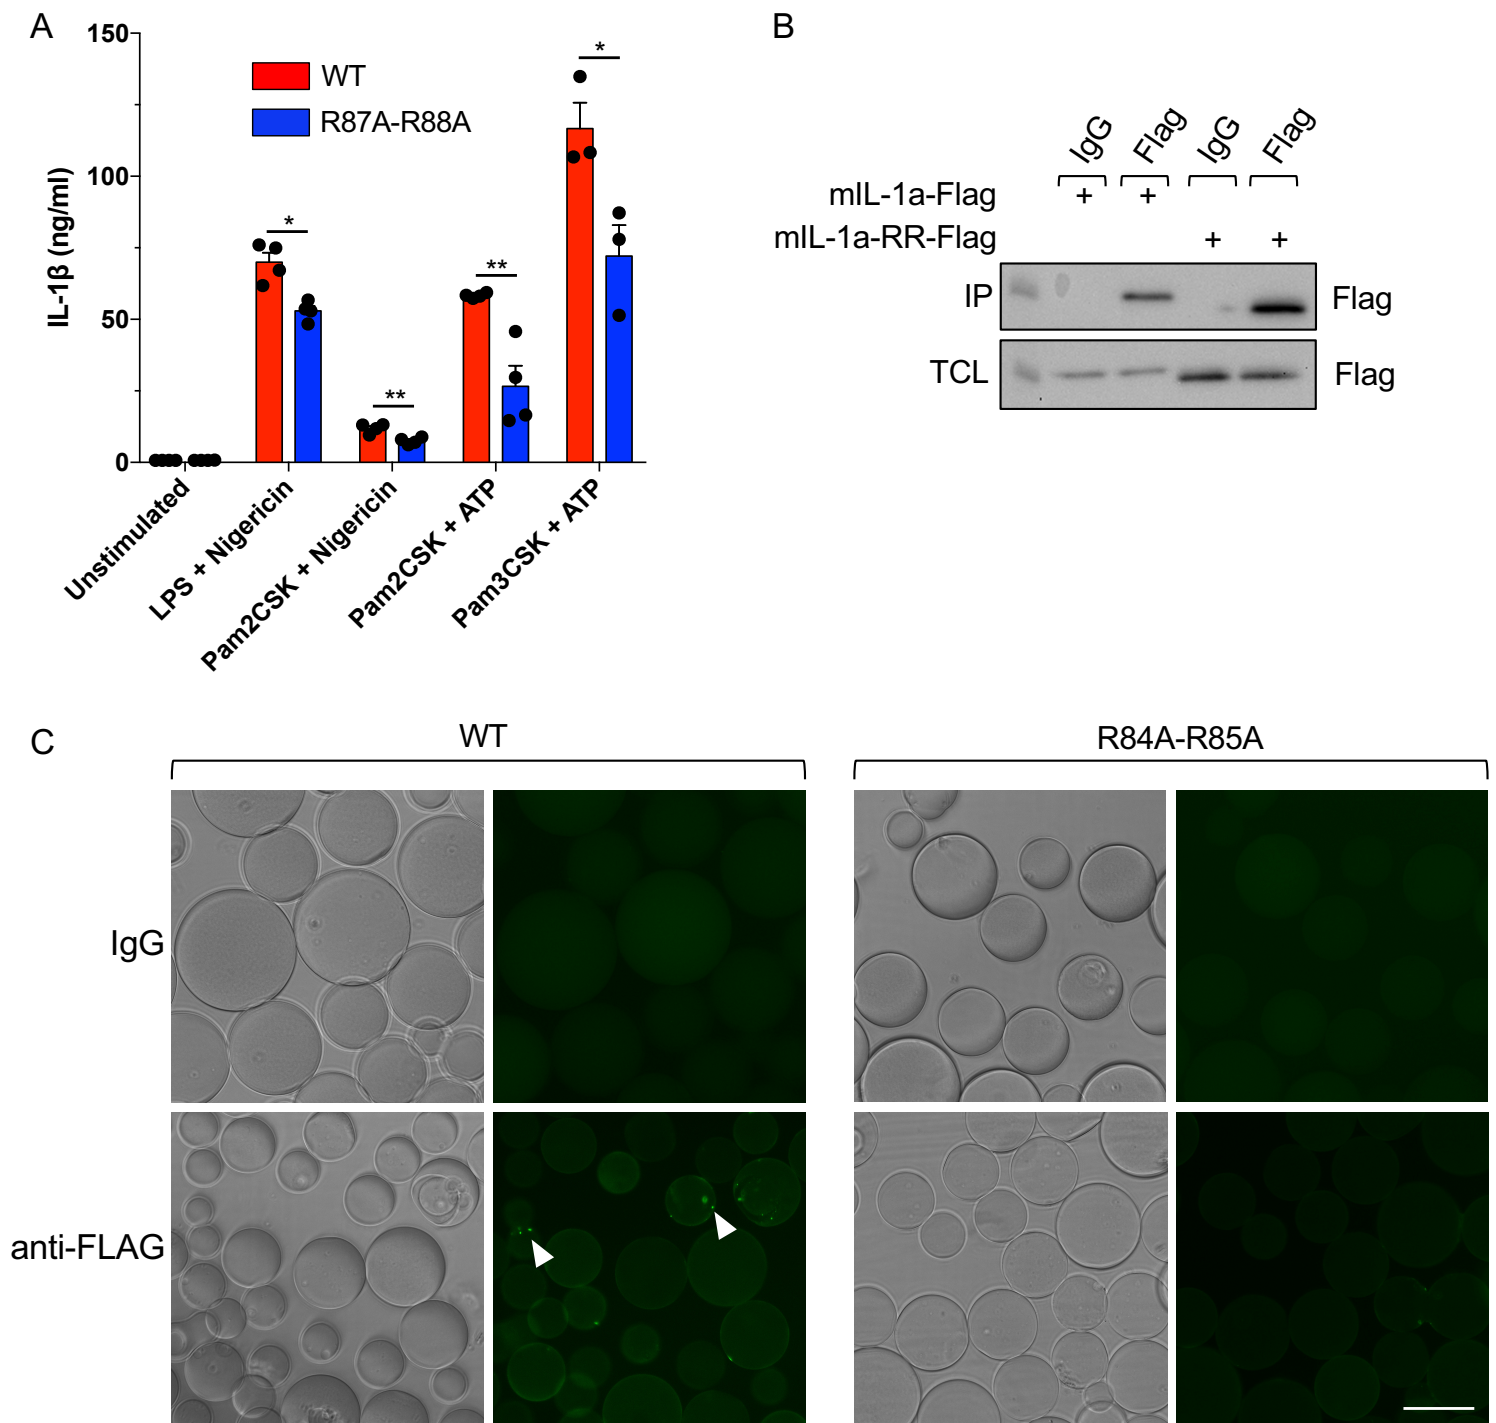

**Figure S8. Mutated pro-IL-1 $\alpha$  reduces IL-1 $\beta$  secretion and CL binding.** (A) *Il1a*<sup>-/-</sup> bone marrow derived macrophages were reconstituted with WT or R84A-R85A mouse *Il1a* and primed and stimulated with indicated reagents. IL-1 $\beta$  secretion measured by ELISA. (B and C) HEK293 cells were transfected with mIL-1a-WT-Flag or mIL-1a-RR-Flag. Anti-FLAG beads were used to immunoprecipitate the FLAG-proteins. Western blot showing WT and R87A-R88A IP (B). FITC labeled CL binding to pro-IL-1 $\alpha$ -FLAG beads shown by fluorescent microscopy (C). Student's t-test was used to analyze the data. \* $p < 0.05$ , \*\* $p < 0.01$ .



**Table S1.** List of motifs variants checked in SwissProt database

| Motif        | # proteins | # type of proteins | # human proteins |
|--------------|------------|--------------------|------------------|
| KxxKxRRxSxxQ | 20         | 6                  | 2                |
| KxxKxRR-SxxQ | 7          | 6                  | 1                |
| KxxKxRRxS    | 159        | 99                 | 18               |
| KxxKxRR-S    | 191        | 92                 | 13               |
| KxxKKRRxS    | 40         | 20                 | 5                |
| KxxKKRR-S    | 7          | 7                  | 0                |

**Table S2.** Selected list of proteins characterized by cardiolipin binding site motif present in pro-IL1 $\alpha$  and LC3. Listed proteins contain information about UniProtID, pathway (based on Reactome information) and/or PDB codes which contain characteristic motif.

| Motif: KxxKxRRxS         |                                                  |           |                                                                                                   |                                            |                                                                        |
|--------------------------|--------------------------------------------------|-----------|---------------------------------------------------------------------------------------------------|--------------------------------------------|------------------------------------------------------------------------|
| Name                     | Protein full name                                | UniProtID | Pathway Name                                                                                      | ReactomeID                                 | PDB code                                                               |
| ABLM3_HUMAN              | Actin-binding LIM protein 3                      | O94929    | DCC mediated attractive signaling                                                                 | R-HSA-418885                               | -                                                                      |
| ANAPT_NEOFI              | Indole diterpene prenyltransferase anaPT         | A1DN10    | -                                                                                                 | -                                          | 4LD7                                                                   |
| ANM5_HUMAN               | Protein arginine N-methyltransferase 5           | O14744    | snRNP Assembly, RMTs methylate histone arginines, Regulation of TP53 Activity through Methylation | R-HSA-191859, R-HSA-3214858, R-HSA-6804760 | 4GQB, 4X60, 4X61, 4X63, 5C9Z, 5EMJ, 5EMK, 5EML, 5EMM, 5FA5, 6CKC, 6K1S |
| ARI4B_HUMAN              | AT-rich interactive domain-containing protein 4B | Q4LE39    | HDACs deacetylate histones, NoRC negatively regulates rRNA expression                             | R-HSA-3214815, R-HSA-427413                | -                                                                      |
| CP51_SCHPO               | Lanosterol 14-alpha demethylase erg11            | Q09736    | Cholesterol biosynthesis, Endogenous sterols                                                      | R-SPO-191273, R-SPO-211976                 | -                                                                      |
| CWC22_DROME              | Pre-mRNA-splicing factor CWC22 homolog           | Q9VJ87    | mRNA Splicing - Major Pathway                                                                     | R-DME-72163                                | -                                                                      |
| DAPK3_HUMAN <sup>†</sup> | Death-associated protein kinase 3                | O43293    | Ligand-independent caspase activation via DCC                                                     | R-HSA-418889                               | 1YRP, 2J90, 3BHY, 3BQR, 5A6N, 5A6O, 5VJA                               |
| GCOB_AMYS7               | Aromatic O-demethylase                           | PODPQ8    | -                                                                                                 | -                                          | 5OGX                                                                   |
| GEM1_YEAST               | Mitochondrial Rho GTPase 1                       | P39722    | Rho GTPase cycle                                                                                  | R-SCE-194840                               | -                                                                      |

|                          |                                             |        |                                                                                                                                                               |                                                                          |      |
|--------------------------|---------------------------------------------|--------|---------------------------------------------------------------------------------------------------------------------------------------------------------------|--------------------------------------------------------------------------|------|
| GRK7A_DANRE <sup>†</sup> | Rhodopsin kinase 1                          | Q49HM9 | Inactivation, recovery and regulation of the phototransduction cascade                                                                                        | R-DRE-2514859                                                            | -    |
| GRK7B_DANRE <sup>†</sup> | Rhodopsin kinase 2                          | Q1XHL7 | Inactivation, recovery and regulation of the phototransduction cascade                                                                                        | R-DRE-2514859                                                            | -    |
| GSH1_CAEEL               | Glutamate--cysteine ligase                  | Q20117 | Glutathione synthesis and recycling                                                                                                                           | R-CEL-174403                                                             | -    |
| HFA6B_ORYSJ              | Heat stress transcription factor A-6a       | Q657C0 | Regulation of HSF1-mediated heat shock response, HSF1 activation, Attenuation phase, HSF1-dependent transactivation                                           | R-OSA-3371453, R-OSA-3371511, R-OSA-3371568, R-OSA-3371571               | -    |
| HFD1_YEAST               | Fatty aldehyde dehydrogenase HFD1           | Q04458 | Sphingolipid de novo biosynthesis, Phase I - Functionalization of compounds, Alpha-oxidation of phytanate, Neutrophil degranulation                           | R-SCE-1660661, R-SCE-211945, R-SCE-389599, R-SCE-6798695                 | -    |
| IL1A_BOVIN* <sup>†</sup> | Interleukin-1 alpha                         | P08831 | Interleukin-1 processing, Interleukin-1 signaling                                                                                                             | R-BTA-448706, R-BTA-9020702                                              | -    |
| IL1A_HUMAN* <sup>†</sup> | Interleukin-1 alpha                         | P01583 | Senescence-Associated Secretory Phenotype (SASP), Interleukin-1 processing, Interleukin-10 signaling, Interleukin-4 and 13 signaling, Interleukin-1 signaling | R-HSA-2559582, R-HSA-448706, R-HSA-6783783, R-HSA-6785807, R-HSA-9020702 | -    |
| IL1A_MOUSE* <sup>†</sup> | Interleukin-1 alpha                         | P01582 | Interleukin-1 processing, Interleukin-1 signaling                                                                                                             | R-MMU-448706, R-MMU-9020702                                              | -    |
| IL1A_PIG* <sup>†</sup>   | Interleukin-1 alpha                         | P18430 | Interleukin-1 processing, Interleukin-1 signaling                                                                                                             | R-SSC-448706, R-SSC-9020702                                              | -    |
| JMJ14_ARATH              | Probable lysine-specific demethylase JMJ14  | Q8GUI6 | HDMs demethylate histones                                                                                                                                     | R-ATH-3214842                                                            | -    |
| KCR1_ARATH               | Very-long-chain 3-oxoacyl-CoA reductase 1   | Q8L9C4 | Androgen biosynthesis, Synthesis of very long-chain fatty acyl-CoAs                                                                                           | R-ATH-193048, R-ATH-75876                                                | -    |
| LPIN1_HUMAN              | Phosphatidate phosphatase LPIN1             | Q14693 | Synthesis of PC, Synthesis of PE, Depolymerisation of the Nuclear Lamin, Triglyceride biosynthesis                                                            | R-HSA-1483191, R-HSA-1483213, R-HSA-4419969, R-HSA-75109                 | -    |
| NIPLB_DANRE              | Nipped-B-like protein B                     | F1QBY1 | Cohesin Loading onto Chromatin                                                                                                                                | R-DRE-2470946                                                            | -    |
| PERM_HUMAN*              | Myeloperoxidase                             | P05164 | Neutrophil degranulation                                                                                                                                      | R-HSA-6798695                                                            | -    |
| PO6F1_HUMAN              | POU domain, class 6, transcription factor 1 | Q14863 | -                                                                                                                                                             | -                                                                        | 3D1N |
| RBBP6_HUMAN              | E3 ubiquitin-protein ligase RBBP6           | Q7Z6E9 | Antigen processing: Ubiquitination & Proteasome degradation                                                                                                   | R-HSA-983168                                                             | -    |
| RBBP6_MOUSE              | E3 ubiquitin-protein ligase RBBP6           | P97868 | Antigen processing: Ubiquitination & Proteasome degradation                                                                                                   | R-MMU-983168                                                             | -    |
| REV3L_HUMAN              | DNA polymerase zeta catalytic subunit       | O60673 | Translesion synthesis by REV1, Translesion synthesis by POLK, Translesion synthesis by POLI                                                                   | R-HSA-110312, R-HSA-5655862, R-HSA-5656121                               | -    |
| RN19A_HUMAN <sup>†</sup> | E3 ubiquitin-protein ligase RNF19A          | Q9NV58 | Antigen processing: Ubiquitination & Proteasome degradation                                                                                                   | R-HSA-983168                                                             | -    |
| RN19A_MOUSE              | E3 ubiquitin-protein ligase RNF19A          | P50636 | Antigen processing: Ubiquitination & Proteasome degradation                                                                                                   | R-MMU-983168                                                             | -    |
| RN19A_PIG <sup>†</sup>   | E3 ubiquitin-protein ligase RNF19A          | Q2VJ60 | Antigen processing: Ubiquitination & Proteasome degradation                                                                                                   | R-SSC-983168                                                             | -    |

|              |                                                                  |        |                                                                                                                                                                                                                                                                                                                                                                                                                                                                                                                                                                                                         |                                                                                                                                                                         |                                                                                                                  |
|--------------|------------------------------------------------------------------|--------|---------------------------------------------------------------------------------------------------------------------------------------------------------------------------------------------------------------------------------------------------------------------------------------------------------------------------------------------------------------------------------------------------------------------------------------------------------------------------------------------------------------------------------------------------------------------------------------------------------|-------------------------------------------------------------------------------------------------------------------------------------------------------------------------|------------------------------------------------------------------------------------------------------------------|
| RPOL_BPT7    | T7 RNA polymerase                                                | P00573 | -                                                                                                                                                                                                                                                                                                                                                                                                                                                                                                                                                                                                       | -                                                                                                                                                                       | 1ARO,<br>1CEZ,<br>1H38,<br>1MSW,<br>1QLN,<br>1SOV,<br>1S76,<br>1S77,<br>2PI4,<br>2PI5,<br>3E2E,<br>3E3J,<br>4RNP |
| SSRP1_HUMAN† | FACT complex subunit SSRP1                                       | Q08945 | Formation of RNA Pol II elongation complex, Formation of HIV elongation complex in the absence of HIV Tat, Formation of HIV-1 elongation complex containing HIV-1 Tat, Pausing and recovery of Tat-mediated HIV elongation, Tat-mediated HIV elongation arrest and recovery, Tat-mediated elongation of the HIV-1 transcript, HIV elongation arrest and recovery, Pausing and recovery of HIV elongation, RNA Polymerase II Pre-transcription Events, TP53 Regulates Transcription of DNA Repair Genes, Regulation of TP53 Activity through Phosphorylation, RNA Polymerase II Transcription Elongation | R-HSA-112382, R-HSA-167152, R-HSA-167200, R-HSA-167238, R-HSA-167243, R-HSA-167246, R-HSA-167287, R-HSA-167290, R-HSA-674695, R-HSA-6796648, R-HSA-6804756, R-HSA-75955 | -                                                                                                                |
| SSRP1_MOUSE† | FACT complex subunit SSRP1                                       | Q08943 | Formation of RNA Pol II elongation complex, RNA Polymerase II Pre-transcription Events, TP53 Regulates Transcription of DNA Repair Genes, Regulation of TP53 Activity through Phosphorylation, RNA Polymerase II Transcription Elongation                                                                                                                                                                                                                                                                                                                                                               | R-MMU-112382, R-MMU-674695, R-MMU-6796648, R-MMU-6804756, R-MMU-75955                                                                                                   | -                                                                                                                |
| SSRP1_RAT†   | FACT complex subunit SSRP1                                       | Q04931 | Formation of RNA Pol II elongation complex, RNA Polymerase II Pre-transcription Events, TP53 Regulates Transcription of DNA Repair Genes, Regulation of TP53 Activity through Phosphorylation, RNA Polymerase II Transcription Elongation                                                                                                                                                                                                                                                                                                                                                               | R-RNO-112382, R-RNO-674695, R-RNO-6796648, R-RNO-6804756, R-RNO-75955                                                                                                   | -                                                                                                                |
| TRPM5_HUMAN  | Transient receptor potential cation channel subfamily M member 5 | Q9NZQ8 | TRP channels                                                                                                                                                                                                                                                                                                                                                                                                                                                                                                                                                                                            | R-HSA-3295583                                                                                                                                                           | -                                                                                                                |
| TTF1_HUMAN†  | Transcription termination factor 1                               | Q15361 | ERCC6 (CSB) and EHMT2 (G9a) positively regulate rRNA expression, NoRC negatively regulates rRNA expression, Surfactant metabolism, Defective pro-SFTPB causes pulmonary surfactant metabolism dysfunction 1 (SMDP1) and respiratory distress syndrome (RDS), RNA Polymerase I Transcription Initiation, RNA Polymerase I Transcription                                                                                                                                                                                                                                                                  | R-HSA-427389, R-HSA-427413, R-HSA-5683826, R-HSA-5688031, R-HSA-73762, R-HSA-73863                                                                                      | -                                                                                                                |

|                        |                                                      |                  | Termination                                                                                                                                                                               |                                                                               |                              |
|------------------------|------------------------------------------------------|------------------|-------------------------------------------------------------------------------------------------------------------------------------------------------------------------------------------|-------------------------------------------------------------------------------|------------------------------|
| <b>Motif: KxxKxRRS</b> |                                                      |                  |                                                                                                                                                                                           |                                                                               |                              |
| <b>Name</b>            | <b>Protein name</b>                                  | <b>UniProtID</b> | <b>Pathway Name</b>                                                                                                                                                                       | <b>ReactomeID</b>                                                             | <b>PDB code</b>              |
| AB12C_ARATH            | ABC transporter C family member 12                   | Q9C8H0           | Platelet degranulation, Hyaluronan biosynthesis and export, ABC-family proteins mediated transport, Ub-specific processing proteases, Cargo recognition for clathrin-mediated endocytosis | R-ATH-114608, R-ATH-2142850, R-ATH-382556, R-ATH-5689880, R-ATH-8856825       | -                            |
| BARX1_HUMAN            | Homeobox protein BarH-like 1                         | Q9HBU1           | -                                                                                                                                                                                         | -                                                                             | 2DMT                         |
| CP51_SCHPO             | Lanosterol 14-alpha demethylase erg11                | Q09736           | Cholesterol biosynthesis, Endogenous sterols                                                                                                                                              | R-SPO-191273, R-SPO-211976                                                    | -                            |
| E41L5_BOVIN            | Band 4.1-like protein 5                              | Q58CU2           | Neurexins and neuroligins                                                                                                                                                                 | R-BTA-6794361                                                                 | -                            |
| E41L5_HUMAN            | Band 4.1-like protein 5                              | Q9HCM4           | Neurexins and neuroligins                                                                                                                                                                 | R-HSA-6794361                                                                 | -                            |
| E41L5_MOUSE            | Band 4.1-like protein 5                              | Q8BGS1           | Neurexins and neuroligins                                                                                                                                                                 | R-MMU-6794361                                                                 | -                            |
| E41L5_RAT              | Band 4.1-like protein 5                              | Q5FVG2           | Neurexins and neuroligins                                                                                                                                                                 | R-RNO-6794361                                                                 | -                            |
| GFLB_DICDI             | Ras guanine nucleotide exchange factor gfb           | Q54L90           | p38MAPK events, NRAGE signals death through JNK, Rho GTPase cycle, G alpha (12/13) signalling events, RAF/MAP kinase cascade                                                              | R-DDI-171007<br>R-DDI-193648<br>R-DDI-194840<br>R-DDI-416482<br>R-DDI-5673001 | -                            |
| GTR3_DROME             | Glucose transporter type 3                           | P53403           | Cellular hexose transport, Cargo recognition for clathrin-mediated endocytosis, Clathrin-mediated endocytosis                                                                             | R-DME-189200, R-DME-8856825, R-DME-8856828                                    | -                            |
| ING2_HUMAN             | Inhibitor of growth protein 2                        | Q9H160           | PI5P Regulates TP53 Acetylation                                                                                                                                                           | R-HSA-6811555                                                                 | -                            |
| MLP3B_MOUSE*           | Microtubule-associated proteins 1A/1B light chain 3B | Q9CQV6           | Macroautophagy, Pink/Parkin Mediated Mitophagy, TBC/RABGAPs, Receptor Mediated Mitophagy                                                                                                  | R-MMU-1632852, R-MMU-5205685, R-MMU-8854214, R-MMU-8934903                    | 5WRD, 5YIQ, 5YIS             |
| MLP3B_RAT*             | Microtubule-associated proteins 1A/1B light chain 3B | Q62625           | -                                                                                                                                                                                         | -                                                                             | 1UGM, 2K6Q, 2Z0D, 2Z0E, 2ZZP |
| NIPLB_DANRE            | Nipped-B-like protein B                              | F1QBY1           | Cohesin Loading onto Chromatin                                                                                                                                                            | R-DRE-2470946                                                                 | -                            |

|             |                                                                       |        |                                                                                                                                                                                                                                                                                                                                                                                                                                                                                                                                                                                                                                    |                                                                                                                                                                                                    |            |
|-------------|-----------------------------------------------------------------------|--------|------------------------------------------------------------------------------------------------------------------------------------------------------------------------------------------------------------------------------------------------------------------------------------------------------------------------------------------------------------------------------------------------------------------------------------------------------------------------------------------------------------------------------------------------------------------------------------------------------------------------------------|----------------------------------------------------------------------------------------------------------------------------------------------------------------------------------------------------|------------|
| OSTP_PIG*   | Osteopontin                                                           | P14287 | Degradation of the extracellular matrix, Signaling by PDGF, Integrin cell surface interactions, Regulation of Insulin-like Growth Factor (IGF) transport and uptake by Insulin-like Growth Factor Binding Proteins (IGFBPs), Post-translational protein phosphorylation                                                                                                                                                                                                                                                                                                                                                            | R-SSC-1474228, R-SSC-186797, R-SSC-216083, R-SSC-381426, R-SSC-8957275                                                                                                                             | -          |
| RHG20_HUMAN | Rho GTPase-activating protein 20                                      | Q9P2F6 | Rho GTPase cycle                                                                                                                                                                                                                                                                                                                                                                                                                                                                                                                                                                                                                   | R-HSA-194840                                                                                                                                                                                       | -          |
| RHG20_MOUSE | Rho GTPase-activating protein 20                                      | Q6IFT4 | Rho GTPase cycle                                                                                                                                                                                                                                                                                                                                                                                                                                                                                                                                                                                                                   | R-MMU-194840                                                                                                                                                                                       | -          |
| RHG20_RAT   | Rho GTPase-activating protein 20                                      | Q6REY9 | Rho GTPase cycle                                                                                                                                                                                                                                                                                                                                                                                                                                                                                                                                                                                                                   | R-RNO-194840                                                                                                                                                                                       | -          |
| RUSD4_HUMAN | Mitochondrial RNA pseudouridine synthase RPU4                         | Q96CM3 | -                                                                                                                                                                                                                                                                                                                                                                                                                                                                                                                                                                                                                                  | -                                                                                                                                                                                                  | 5UBA       |
| UBD_HUMAN   | Ubiquitin D                                                           | O15205 | Neddylation                                                                                                                                                                                                                                                                                                                                                                                                                                                                                                                                                                                                                        | R-HSA-8951664                                                                                                                                                                                      | 2MBE, 6GF1 |
| XPB2_ARATH  | General transcription and DNA repair factor IIH helicase subunit XPB2 | Q9FUG4 | Formation of the Early Elongation Complex, Formation of Incision Complex in GG-NER, Dual Incision in GG-NER, RNA Polymerase II Pre-transcription Events, Formation of TC-NER Pre-Incision Complex, Dual incision in TC-NER, Gap-filling DNA repair synthesis and ligation in TC-NER, TP53 Regulates Transcription of DNA Repair Genes, mRNA Capping, RNA Polymerase II Promoter Escape, RNA Polymerase II Transcription Pre-Initiation And Promoter Opening, RNA Polymerase II Transcription Initiation, RNA Polymerase II Transcription Initiation And Promoter Clearance, RNA Pol II CTD phosphorylation and interaction with CE | R-ATH-113418, R-ATH-5696395, R-ATH-5696400, R-ATH-674695, R-ATH-6781823, R-ATH-6782135, R-ATH-6782210, R-ATH-6796648, R-ATH-72086, R-ATH-73776, R-ATH-73779, R-ATH-75953, R-ATH-76042, R-ATH-77075 | -          |
| ZN607_HUMAN | Zinc finger protein 607                                               | Q96SK3 | Generic Transcription Pathway                                                                                                                                                                                                                                                                                                                                                                                                                                                                                                                                                                                                      | R-HSA-212436                                                                                                                                                                                       | -          |

\* Present in KxxKxRRxSxxQ or KxxKxRR-SxxQ motif.

† Present in KxxKRRxS

**Table S3. Key Resources**

| REAGENT or RESOURCE                                  | SOURCE                   | IDENTIFIER          |
|------------------------------------------------------|--------------------------|---------------------|
| <b>Antibodies</b>                                    |                          |                     |
| Anti-IL-1a                                           | R&D system               | Cat # AF-400-NA     |
| Anti-Nlrp3                                           | R&D system               | Cat # MAB7578       |
| Anti-Caspase1 p12/p10                                | Abcam                    | Cat # 179515        |
| Anti-COX IV                                          | Cell Signaling           | Cat # 4844          |
| Anti-GAPDH (D16H11)                                  | Cell Signaling           | Cat # 5174          |
| Anti-Cytochrome c (D18C7) Rabbit mAb                 | Cell Signaling           | Cat # 11940S        |
| Anti-LC3b DyLight 650                                | Thermofisher Scientific  | Cat # PA5-22937     |
| Anti-His Tag, pAb, Rabbit                            | GenScript                | Cat # A00174-40     |
| Anti-PLSCR3                                          | Abcam                    | Cat # ab137128      |
| Anti-LC3                                             | Cell Signaling           | Cat # 4108          |
| Anti-Pink1                                           | Abcam                    | Cat# ab23707        |
| Anti-GAPDH                                           | Santa Cruz Biotech       | Cat# sc-137139      |
| Anti-Flag M2, mAb, Mouse                             | Sigma-Aldrich            | Cat # F3165-1MG     |
| Normal mouse IgG                                     | Santa Cruz Biotechnology | Cat # sc-2025       |
| Goat anti-mouse IgG-HRP                              | Santa Cruz Biotechnology | sc-2005             |
| <b>Bacterial and Virus Strains</b>                   |                          |                     |
|                                                      |                          |                     |
| <b>Biological Samples</b>                            |                          |                     |
| Mouse peritoneal macrophages                         |                          |                     |
| HEK293 cell line                                     |                          |                     |
| Lenti-X 293T                                         | Takara/Clontech          | Cat# 632180         |
| MCL cell line                                        |                          |                     |
| L929 cells supernatant                               | ATCC                     | CCL-1               |
| <b>Chemicals, Peptides, and Recombinant Proteins</b> |                          |                     |
| IL1A (Human) Recombinant Protein (P01)               | Abnova                   | Cat # H00003552-P01 |
| Membrane Lipid Strips                                | Echelon Biosciences      | Cat # P-6002        |

|                                                   |                              |                                                                                                                                                                |
|---------------------------------------------------|------------------------------|----------------------------------------------------------------------------------------------------------------------------------------------------------------|
| ATP                                               | Thermofisher Scientific      | Cat # R0441                                                                                                                                                    |
| Pam2CSK4                                          | Invivogen                    | Cat # tlrl-pm2s-1                                                                                                                                              |
| LPS                                               | Sigma Aldrich                | Cat # L2630                                                                                                                                                    |
| sn-1-Fluorescein-labeled cardiolipin              | Echelon Biosciences          | Cat # L-C16F                                                                                                                                                   |
| NIGERICIN                                         | Enzo Life Sciences           | BML-CA421-0005                                                                                                                                                 |
| ANTI-FLAG® M2 Affinity Gel                        | Millipore                    | Cat # A2220-1ML                                                                                                                                                |
| Protein A/G agarose                               | Santa Cruz Biotechnology)    | Cat # sc-2003                                                                                                                                                  |
| <b>Critical Commercial Assays</b>                 |                              |                                                                                                                                                                |
| Mitochondria Isolation Kit                        | Abcam                        | Cat # ab110170                                                                                                                                                 |
| Lipofectamine™ RNAiMAX transfection reagent       | Thermofisher Scientific      | Cat # 13778150                                                                                                                                                 |
| Lipofectamine™ LTX reagent with PLUS reagent      | Thermofisher Scientific      | Cat # 15338030                                                                                                                                                 |
| Lipofectamine™ 2000 transfection reagent          | Thermofisher Scientific      | Cat # 11668019                                                                                                                                                 |
| QuikChange II XL Site-Directed Mutagenesis Kit    | Agilent technologies         | Cat # 200523                                                                                                                                                   |
| <b>Experimental Models: Organisms/Strains</b>     |                              |                                                                                                                                                                |
| C57BL/6J                                          | Jackson Lab                  | stock 000664                                                                                                                                                   |
| <i>Il1a</i> <sup>-/-</sup>                        | University of Tokyo          | Dr. Yoichiro Iwakura                                                                                                                                           |
| <i>Atg16l1<sup>fl/fl</sup>LysMCre</i>             | Cedars- Sinai Medical Center | Dr. David Shih                                                                                                                                                 |
| <b>Oligonucleotides, plasmids and PCR primers</b> |                              |                                                                                                                                                                |
| pHIV-dTomato                                      | Addgene                      | pHIV-dTomato was a gift from Bryan Welm (Addgene plasmid #21374; <a href="http://n2t.net/addgene:21374">http://n2t.net/addgene:21374</a> ; RRID:Addgene_21374) |
| psPAX2                                            | Addgene                      | psPAX2 was a gift from Didier Trono (Addgene plasmid # 12260; <a href="http://n2t.net/addgene:12260">http://n2t.net/addgene:12260</a> ; RRID:Addgene_12260)    |

|                                                                                                                                                                                                                               |                      |                                                                                                                                                             |
|-------------------------------------------------------------------------------------------------------------------------------------------------------------------------------------------------------------------------------|----------------------|-------------------------------------------------------------------------------------------------------------------------------------------------------------|
| pMD2.G                                                                                                                                                                                                                        | Addgene              | pMD2.G was a gift from Didier Trono (Addgene plasmid # 12259; <a href="http://n2t.net/addgene:12259">http://n2t.net/addgene:12259</a> ; RRID:Addgene_12259) |
| PCR amplification primers for cloning IL-1a-Flag into pHIV-dTomato:<br>IL-1a fwd – EcoRI:<br>5'-CCCGAATTCACCATGGCCAAAGTTCCTGACTTGTGGTGAAGACC-3'<br>IL-1a rev – BamHI:<br>5'-CCCGGATCCTTACTTATCGTCGTCATCC TTGTAATCAGAGCCTCC-3' | Invitrogen           | PCR template:<br>mouse IL-1a-Flag cDNA clone (Sino Biological Inc; MG50114-CF)<br><br>Custom primers (Invitrogen)                                           |
| siRNA negative control                                                                                                                                                                                                        | MyBiosource          | MBS8241404                                                                                                                                                  |
| IL-1A siRNA                                                                                                                                                                                                                   | MyBiosource          | MBS8200312                                                                                                                                                  |
| HAX1 siRNA                                                                                                                                                                                                                    | MyBiosource          | MBS8220685                                                                                                                                                  |
| PLSCR3 siRNA                                                                                                                                                                                                                  | MyBiosource          | MBS8212879                                                                                                                                                  |
| Human IL1F1/IL1a-Flag cDNA clone                                                                                                                                                                                              | Sino Biological Inc  | HG10128-CF                                                                                                                                                  |
| Mouse IL1F1/IL1a-His cDNA clone                                                                                                                                                                                               | Sino Biological Inc  | MG50114-NH                                                                                                                                                  |
| Mouse IL1F1/IL1a-Flag cDNA clone                                                                                                                                                                                              | Sino Biological Inc  | MG50114-CF                                                                                                                                                  |
| NLRP3<br>Left; 5'-TCCACAATTCTGACCCACAA-3'<br>Right; 5'-ACCTCACAGAGGGTCACCAC-3'                                                                                                                                                |                      | <a href="http://www.ncbi.nlm.nih.gov/nucleotide/NM_145827.3">http://www.ncbi.nlm.nih.gov/nucleotide/NM_145827.3</a>                                         |
| IL-1a<br>Left; 5'-AGACCATCCAACCCAGATCA-3'<br>Right; 5'-TGACAACTTCTGCCTGACG-3'                                                                                                                                                 |                      | <a href="http://www.ncbi.nlm.nih.gov/nucleotide/NM_010554.4">http://www.ncbi.nlm.nih.gov/nucleotide/NM_010554.4</a>                                         |
| IL-1b<br>Left; 5'-CAGGCAGGCAGTATCACTCA-3'<br>Right; 5'-TGTCCTCATCCTGGAAGGTC-3'                                                                                                                                                |                      | <a href="http://www.ncbi.nlm.nih.gov/nucleotide/NM_008361.3">http://www.ncbi.nlm.nih.gov/nucleotide/NM_008361.3</a>                                         |
| GAPDH<br>Left; 5'-ACCCAGAAGACTGTGGATGG-3'<br>Right; 5'-GGATGCAGGGATGATGTTCT-3'                                                                                                                                                |                      | <a href="http://www.ncbi.nlm.nih.gov/nucleotide/GU214026.1">http://www.ncbi.nlm.nih.gov/nucleotide/GU214026.1</a>                                           |
| IL-18<br>Left; 5'-TCCATGCTTTCTGGACTCCT-3'<br>Right; 5'-GGCTTTCTTTGTCCTGATGC-3'                                                                                                                                                |                      | <a href="https://www.ncbi.nlm.nih.gov/nucleotide/NM_008360">https://www.ncbi.nlm.nih.gov/nucleotide/NM_008360</a>                                           |
| <b>Software and Algorithms</b>                                                                                                                                                                                                |                      |                                                                                                                                                             |
| Prism 7.0                                                                                                                                                                                                                     | GraphPad Software    | <a href="https://www.graphpad.com">https://www.graphpad.com</a>                                                                                             |
| Image Lab                                                                                                                                                                                                                     | Bio-Rad Laboratories | <a href="http://www.bio-rad.com/en-cn/product/image-lab-software">http://www.bio-rad.com/en-cn/product/image-lab-software</a>                               |



|                                                       |                         |                                                                                                                                 |
|-------------------------------------------------------|-------------------------|---------------------------------------------------------------------------------------------------------------------------------|
| BZ-X analyzer                                         | Keyence                 | <a href="https://www.keyence.com/s/s/products/microscope/bz-x700/">https://www.keyence.com/s/s/products/microscope/bz-x700/</a> |
| Summit V4.3 Flow cytometry                            | Dako Colorado, Inc      |                                                                                                                                 |
| Leica Microsystems LAS AF Lite                        | Leica microsystems      |                                                                                                                                 |
| FlowJo 10.6.1                                         | BD                      |                                                                                                                                 |
| Echo Revolve Fluorescence Microscope                  | Echo                    |                                                                                                                                 |
| Varioskan™ LUX multimode microplate reader            | Thermofisher Scientific |                                                                                                                                 |
| <b>Other</b>                                          |                         |                                                                                                                                 |
| SuperSignal West Pico PLUS Chemiluminescent Substrate | Thermofisher Scientific | Prod # 34577                                                                                                                    |
| Fixation/Permeabilization Solution kit                | BD Biosciences          | Cat # 554714                                                                                                                    |
| Sea Block serum free-PBS                              | abcam                   | Cat # ab166955                                                                                                                  |
|                                                       |                         |                                                                                                                                 |

Contact for Reagent and Resource Sharing

Further information and requests for resources and reagents should be directed to and will be fulfilled by Moshe Arditi (Moshe.Arditi@cshs.org).

## SI References

1. K. Arnold, L. Bordoli, J. Kopp, T. Schwede, The SWISS-MODEL workspace: a web-based environment for protein structure homology modelling. *Bioinformatics* **22**, 195-201 (2006).
2. H. M. Berman *et al.*, "The Protein Data Bank, 1999" in International Tables for Crystallography Volume F: Crystallography of biological macromolecules. (Springer, 2006), pp. 675-684.
3. D. Xu, L. Jaroszewski, Z. Li, A. Godzik, AIDA: ab initio domain assembly server. *Nucleic acids research* **42**, W308-W313 (2014).
4. J. Phillips *et al.*, Scalable molecular dynamics with NAMD. *J. Comput. Chem.* **26**, 1781-1802 (2005).
5. A. D. MacKerell *et al.*, All-atom empirical potential for molecular modeling and dynamics studies of proteins. *J Phys Chem B* **102**, 3586-3616 (1998).
6. S. Miyamoto, P. A. Kollman, Settle - an Analytical Version of the Shake and Rattle Algorithm for Rigid Water Models. *J. Comput. Chem.* **13**, 952-962 (1992).
7. A. Bakan, L. M. Meireles, I. Bahar, ProDy: protein dynamics inferred from theory and experiments. *Bioinformatics* **27**, 1575-1577 (2011).
8. A. Bakan *et al.*, Evol and ProDy for bridging protein sequence evolution and structural dynamics. *Bioinformatics* **30**, 2681-2683 (2014).
9. D. Comaniciu, P. Meer, Mean shift: A robust approach toward feature space analysis. *IEEE Trans. Pattern Anal. Mach. Intell.* **24**, 603-619 (2002).
10. I. Cohen *et al.*, IL-1alpha is a DNA damage sensor linking genotoxic stress signaling to sterile inflammation and innate immunity. *Sci. Rep.* **5**, 14756 (2015).

11. S. Jo, T. Kim, V. G. Iyer, W. Im, CHARMM-GUI: a web-based graphical user interface for CHARMM. *J Comput Chem* **29**, 1859-1865 (2008).
12. S. Jo, J. B. Lim, J. B. Klauda, W. Im, CHARMM-GUI Membrane Builder for mixed bilayers and its application to yeast membranes. *Biophys J* **97**, 50-58 (2009).
13. J. Lee *et al.*, CHARMM-GUI input generator for NAMD, GROMACS, AMBER, OpenMM, and CHARMM/OpenMM simulations using the CHARMM36 additive force field. *J. Chem. Theo. Comput.* **12**, 405-413 (2015).
14. R. Apweiler *et al.*, UniProt: the universal protein knowledgebase. *Nuc. Acids Res.* **32**, D115-D119 (2004).
15. W. Humphrey, A. Dalke, K. Schulten, VMD: visual molecular dynamics. *J. Mol. Graph.* **14**, 33-38 (1996).
16. A. Bakan *et al.*, Evol and ProDy for bridging protein sequence evolution and structural dynamics. *Bioinformatics* **30**, 2681-2683 (2014).
17. M. Larkin *et al.*, Clustal W and Clustal X version 2.0. *Bioinformatics* **23**, 2947-2948 (2007).
18. A. M. Waterhouse, J. B. Procter, D. M. Martin, M. Clamp, G. J. Barton, Jalview Version 2--a multiple sequence alignment editor and analysis workbench. *Bioinformatics* **25**, 1189-1191 (2009).

**Movie S1 and S2.** WT (S1) and *I1a<sup>-/-</sup>* (S2) peritoneal macrophages were treated with LPS and ATP and stained with TMRM to observe mitochondrial membrane potential changes.
